# Supplementary material for: Clinical Effectiveness of Dry Needling in Patients with Musculoskeletal Pain—An Umbrella Review
Source: MDPI journal article supplement (doi:10.3390/jcm12031205), 2023-02-02
Supplement: s1 [file s1]

## UPPER QUARTER

|                                     | Al-Moraissi<br>(2019) (33) | Blanco-Diaz et al.<br>(2022) (34) | Cagnie et al.<br>(2015) (35) | Fernández-De-<br>Las-Peñas. (2021)<br>(36) | Hall et al. (2018)<br>(21) | Kietrys et al.<br>(2013) (37) | Lew et al. (2021)<br>(38) | Liu et al. (2015)<br>(39) | Machado et al.<br>(2018) (40) | Navarro-Santana<br>et al. (2020) (41) | Navarro-Santana<br>et al. (2020) (22) | Navarro-Santana<br>et al. (2021) (42) | Navarro-Santana<br>et al. (2022) (43) | Ong et al. (2013)<br>(44) | Pourahmadi et al.<br>(2021) (45) | Rodríguez-<br>Huguet et al.<br>(2022) (46) |
|-------------------------------------|----------------------------|-----------------------------------|------------------------------|--------------------------------------------|----------------------------|-------------------------------|---------------------------|---------------------------|-------------------------------|---------------------------------------|---------------------------------------|---------------------------------------|---------------------------------------|---------------------------|----------------------------------|--------------------------------------------|
| Blanco-Diaz et al. (2022) (34)      | 0,00%                      |                                   |                              |                                            |                            |                               |                           |                           |                               |                                       |                                       |                                       |                                       |                           |                                  |                                            |
| Cagnie et al. (2015) (35)           | 0,00%                      | 0,00%                             |                              |                                            |                            |                               |                           |                           |                               |                                       |                                       |                                       |                                       |                           |                                  |                                            |
| Fernández-De-Las-Peñas. (2021) (36) | 0,00%                      | 0,00%                             | 0,00%                        |                                            |                            |                               |                           |                           |                               |                                       |                                       |                                       |                                       |                           |                                  |                                            |
| Hall et al. (2018) (21)             | 0,00%                      | 5,26%                             | 0,00%                        | 0,00%                                      |                            |                               |                           |                           |                               |                                       |                                       |                                       |                                       |                           |                                  |                                            |
| Kietrys et al. (2013) (37)          | 0,00%                      | 0,00%                             | 25,00%                       | 0,00%                                      | 9,52%                      |                               |                           |                           |                               |                                       |                                       |                                       |                                       |                           |                                  |                                            |
| Lew et al. (2021) (38)              | 0,00%                      | 0,00%                             | 0,00%                        | 4,00%                                      | 6,25%                      | 0,00%                         |                           |                           |                               |                                       |                                       |                                       |                                       |                           |                                  |                                            |
| Liu et al. (2015) (39)              | 0,00%                      | 0,00%                             | 21,74%                       | 3,70%                                      | 10,71%                     | 52,38%                        | 4,00%                     |                           |                               |                                       |                                       |                                       |                                       |                           |                                  |                                            |
| Machado et al. (2018) (40)          | 30,00%                     | 0,00%                             | 0,00%                        | 0,00%                                      | 0,00%                      | 0,00%                         | 0,00%                     | 0,00%                     |                               |                                       |                                       |                                       |                                       |                           |                                  |                                            |
| Navarro-Santana et al. (2020) (41)  | 0,00%                      | 0,00%                             | 5,88%                        | 2,86%                                      | 2,63%                      | 11,11%                        | 21,43%                    | 11,63%                    | 0,00%                         |                                       |                                       |                                       |                                       |                           |                                  |                                            |
| Navarro-Santana et al. (2020) (22)  | 0,00%                      | 0,00%                             | 0,00%                        | 0,00%                                      | 0,00%                      | 0,00%                         | 0,00%                     | 0,00%                     | 0,00%                         | 0,00%                                 |                                       |                                       |                                       |                           |                                  |                                            |
| Navarro-Santana et al. (2021) (42)  | 0,00%                      | 15,38%                            | 0,00%                        | 0,00%                                      | 13,33%                     | 0,00%                         | 9,09%                     | 0,00%                     | 0,00%                         | 0,00%                                 | 0,00%                                 |                                       |                                       |                           |                                  |                                            |
| Navarro-Santana et al. (2022) (43)  | 0,00%                      | 0,00%                             | 25,00%                       | 0,00%                                      | 0,00%                      | 11,76%                        | 0,00%                     | 17,39%                    | 0,00%                         | 0,00%                                 | 0,00%                                 | 0,00%                                 |                                       |                           |                                  |                                            |
| Ong et al. (2013) (44)              | 0,00%                      | 0,00%                             | 0,00%                        | 0,00%                                      | 0,00%                      | 30,77%                        | 0,00%                     | 25,00%                    | 0,00%                         | 3,13%                                 | 50,00%                                | 0,00%                                 | 0,00%                                 |                           |                                  |                                            |
| Pourahmadi et al. (2021) (45)       | 0,00%                      | 0,00%                             | 18,75%                       | 0,00%                                      | 0,00%                      | 0,00%                         | 0,00%                     | 0,00%                     | 0,00%                         | 0,00%                                 | 0,00%                                 | 0,00%                                 | 0,00%                                 | 0,00%                     |                                  |                                            |
| Rodríguez-Huguet et al. (2022) (46) | 0,00%                      | 0,00%                             | 0,00%                        | 18,75%                                     | 0,00%                      | 4,55%                         | 13,33%                    | 3,33%                     | 0,00%                         | 8,33%                                 | 0,00%                                 | 0,00%                                 | 0,00%                                 | 0,00%                     | 0,00%                            |                                            |
| Vier et al. (2019) (47)             | 12,00%                     | 0,00%                             | 0,00%                        | 0,00%                                      | 0,00%                      | 0,00%                         | 0,00%                     | 0,00%                     | 31,58%                        | 0,00%                                 | 0,00%                                 | 0,00%                                 | 0,00%                                 | 0,00%                     | 0,00%                            | 0,00%                                      |

Table S4: Overlap for pairs of reviews – Upper Quarter.

Overlap thresholds: 0–5% - slight (white), 6–10% - moderate (green), 11–15% - high (yellow), >15% - very high (red).

## LOWER QUARTER

|                             | He et al.<br>(2017) (48) | Hu et al.(49) | Khan et<br>al.(50) | Liu et al.(51) | Llurda-<br>Almuzara et<br>al.(52) | Morihisa et<br>al.(53) | Rahou-El-<br>Bachiri et<br>al.(54) |
|-----------------------------|--------------------------|---------------|--------------------|----------------|-----------------------------------|------------------------|------------------------------------|
| Hu et al.(49)               | 0,00%                    |               |                    |                |                                   |                        |                                    |
| Khan et al.(50)             | 13,33%                   | 0,00%         |                    |                |                                   |                        |                                    |
| Liu et al.(51)              | 0,00%                    | 68,75%        | 0,00%              |                |                                   |                        |                                    |
| Llurda-Almuzara et al.(52)  | 18,18%                   | 0,00%         | 14,29%             | 0,00%          |                                   |                        |                                    |
| Morihisa et al.(53)         | 8,33%                    | 4,76%         | 23,08%             | 6,25%          | 9,09%                             |                        |                                    |
| Rahou-El-Bachiri et al.(54) | 0,00%                    | 0,00%         | 17,65%             | 0,00%          | 0,00%                             | 6,67%                  |                                    |
| Ughreja et al.(55)          | 0,00%                    | 0,00%         | 0,00%              | 0,00%          | 0,00%                             | 0,00%                  | 11,76%                             |

Table S5: Overlap for pairs of reviews – Lower Quarter.

Overlap thresholds: 0–5% - slight (white), 6–10% - moderate (green), 11–15% - high (yellow), >15% - very high (red).

# WHOLE BODY

|                                       | Boyles et al.<br>(2015) (23) | Charles et<br>al.(2019) (24) | Cummings et<br>al. (2001) (25) | Espejo-Antúnez<br>et al. (2017) (26) | Gattie et al.<br>(2017) (27) | Kim et al. (2012)<br>(28) | Mansfield et al.<br>(2019) (20) | Rodríguez-<br>Mansilla et al.<br>(2016) (29) | Sánchez-<br>Infante et al.<br>(2011) (30) | Sousa Filho et<br>al. (2021) (31) |
|---------------------------------------|------------------------------|------------------------------|--------------------------------|--------------------------------------|------------------------------|---------------------------|---------------------------------|----------------------------------------------|-------------------------------------------|-----------------------------------|
| Charles et al. (2019) (24)            | 23,53%                       |                              |                                |                                      |                              |                           |                                 |                                              |                                           |                                   |
| Cummings et al. (2001) (25)           | 0,00%                        | 3,70%                        |                                |                                      |                              |                           |                                 |                                              |                                           |                                   |
| Espejo-Antúnez et al. (2017) (26)     | 36,00%                       | 46,15%                       | 0,00%                          |                                      |                              |                           |                                 |                                              |                                           |                                   |
| Gattie et al. (2017) (27)             | 18,52%                       | 44,00%                       | 0,00%                          | 21,74%                               |                              |                           |                                 |                                              |                                           |                                   |
| Kim et al. (2012) (28)                | 0,00%                        | 0,00%                        | 0,00%                          | 0,00%                                | 0,00%                        |                           |                                 |                                              |                                           |                                   |
| Mansfield et al. (2019) (20)          | 2,56%                        | 4,76%                        | 0,00%                          | 2,86%                                | 6,25%                        | 0,00%                     |                                 |                                              |                                           |                                   |
| Rodríguez-Mansilla et al. (2016) (29) | 26,67%                       | 31,25%                       | 0,00%                          | 21,43%                               | 3,23%                        | 0,00%                     | 2,56%                           |                                              |                                           |                                   |
| Sánchez-Infante et al. (2011) (30)    | 10,91%                       | 18,18%                       | 0,00%                          | 11,76%                               | 19,57%                       | 0,00%                     | 8,62%                           | 3,39%                                        |                                           |                                   |
| Sousa Filho et al. (2021) (31)        | 0,00%                        | 0,00%                        | 0,00%                          | 0,00%                                | 0,00%                        | 0,00%                     | 0,00%                           | 4,17%                                        | 0,00%                                     |                                   |
| Tough et al. (2009) (32)              | 4,00%                        | 15,38%                       | 9,09%                          | 4,76%                                | 0,00%                        | 0,00%                     | 0,00%                           | 13,04%                                       | 0,00%                                     | 0,00%                             |

Table S6: Overlap for pairs of reviews – Full body.

Overlap thresholds: 0–5% - slight (white), 6–10% - moderate (green), 11–15% - high (yellow), >15% - very high (red).
