# Supplementary material for: Clinical Effectiveness of Dry Needling in Patients with Musculoskeletal Pain—An Umbrella Review
Source: J Clin Med. 2023 Feb 2;12(3):1205. doi: 10.3390/jcm12031205 (PMC9917679; doi:10.3390/jcm12031205)
Supplement: Supplementary file 1 [file jcm-12-01205-s001.zip]

Archive with 4 entries (4 files):
- Suppl. Material_Table S1-S2_Search Strategy.pdf
- Suppl. Material_Table S3_Reference list primary studies.pdf
- Suppl. Material_Table S4-S6_CCA_Pairs of Reviews.pdf
- Suppl. Material_Table S7_Citation Matrix.xlsx
