# Supplementary material for: Clinical Effectiveness of Dry Needling in Patients with Musculoskeletal Pain—An Umbrella Review
Source: J Clin Med. 2023 Feb 2;12(3):1205. doi: 10.3390/jcm12031205 (PMC9917679; doi:10.3390/jcm12031205)
Supplement: Supplementary file 1 [file jcm-12-01205-s001.zip › Suppl. Material_Table S7_Citation Matrix.xlsx]

## Sheet: Overlap in all primary studies
	Systematic Review number	1	2	3	4	5	6	7	8	9	10	11	12	13	14	15	16	17	18	19	20	21	22	23	24	25	26	27	28	29	30	31	32	33	34	35	36
RCTs		Boyles et al. (2015)	Charles et al. (2019)	Cummings et al. (2001)	Espejo-Antunez et al. (2017)	Gattie et al. (2017)	Kim et al. (2012)	Mansfield et al. (2019)	Rodriguez-Mansilla et al. (2016)	Sanchez-Infante et al. (2021)	Sousa-Filho et al. (2021)	Tough et al. (2009)	Fernandez-De-Las-Penas et al.(2021)	Kietrys et al. (2013)	Machado et al. (2018)	Vier et al. (2019)	Cagnie et al.(2015)	Lew et al.(2021)	Navarro-Santana et al. (2020)	Navarro-Santana et al.(2021)	Pourahmadi et al.(2021)	Liu et al.(2015)	Ong et al. (2013)	Blanco-Diaz et al.(2022)	Hall et al.(2018)	Navarro-Santana et al.(2020)	Rodriguez-Huguet (2022)	Navarro-Santana (2021)	Al-Moraissi et al. (2019)	Khan et al. (2021)	Morihisa et al. (2016)	Hu et al. (2018)	Liu et al. (2018)	Rahou-El-Bachiri et al. (2020)	Ughreja et al. (2021)	He et al. (2017)	Llurda-Almuzara et al. (2021)
Number of studies		19	23	5	15	13	4	21	19	42	6	7	8	12	18	7	8	6	28	7	11	20	5	9	11	7	11	6	21	10	6	16	11	10	9	7	6
Region	Full body:	FB	FB	FB	FB	FB	FB	FB	FB	FB	FB	FB	UQ	UQ	UQ	UQ	UQ	UQ	UQ	UQ	UQ	UQ	UQ	UQ	UQ	UQ	UQ	UQ	UQ	LQ	LQ	LQ	LQ	LQ	LQ	LQ	LQ
1	Irnich et al. (2002)	1	1		1				1					1								1					1
2	Edwards et al. (2003)	1	1			1			1																						1
3	Huguenin et al. (2005)	1							1			1																		1	1
4	Itoh et al. (2014)	1																							1			1
5	Ay et al. (2010)	1	1		1				1					1			1			1		1	1
6	Fernandez-Carnero et al. (2010)	1							1						1	1													1
7	Perez-Palomares et al. (2010)	1				1				1
8	Srbely et al. (2010)	1							1																1
9	Dırac ̧oglu et al. (2012)	1			1										1	1													1
10	Eftekhar-Sadat et al. (2012)	1
11	Myburgh et al. (2012)	1															1		1
12	Tsai et al. (2010)	1	1		1				1					1								1
13	Eroglu et al. (2013)	1			1												1			1
14	Mayoral et al. (2013)	1	1		1	1		1		1																				1	1			1
15	Tekin et al. (2013)	1	1		1				1	1				1					1			1								1
16	Cotchett et al. (2014)	1								1																				1	1					1	1
17	Mejuto-Vazques et al. (2014)	1	1		1	1				1									1
18	Zheng et al. (2014)	1
19	Llamas-Ramos et al. (2014)	1	1		1	1				1								1	1								1
20	Hong et al. (1993)		1
21	Chu et al. (1997)		1	1								1		1
22	Ilbuldu et al. (2004)		1		1				1			1		1					1			1	1
23	DiLorenzo et al. (2004)		1						1			1		1								1			1
24	Kamanli et al. (2005)		1		1				1					1						1		1	1
25	Itoh et al. (2007)		1									1		1			1		1			1
26	Ga et al. (2007a)		1		1				1					1			1					1
27	Hsiehet al. ( 2007)		1						1	1				1								1			1
28	Casanueva et al. (2014)		1			1
29	Santos et al. (2014)		1			1
30	Ziaeifar et al. (2014)		1		1	1				1								1	1			1			1
31	Arias-Buria et al. (2015)		1			1		1		1															1
32	Campa-Moran et al. (2015)		1			1				1								1	1
33	Pecos-Martin et al. (2015)		1		1	1				1									1
34	Salom-Moreno et al. (2015)		1			1				1
35	Garvey et al. (1989)			1																												1
36	Hesse et al. (1994)			1																	1
37	Hong et al. (1994)			1										1			1			1		1	1
38	McMillan et al. (1997)			1											1	1													1
39	Couto et al. (2014)				1
40	Sterling et al. (2015)					1							1
41	Ahn et al. (2002)						1
42	Gunn et al. (1980)						1
43	Karakurum et al. (2001)						1														1
44	Byeon et al. (2003°						1															1
45	Cerezo-Tellez et al. (2016a)							1		1			1
46	Cerezo-Tellez et al. (2016b)							1		1			1														1
47	Calvo-Lobo et al. (2017)							1																	1
48	Calvo-Lobo et al. (2018)							1																	1			1
49	Hsu et al. (2016)							1
50	Fink et al. (2002)							1
51	Davidson et al. (2001)							1
52	Zanin et al. (2014)							1
53	Fleckenstein et al. (2016)							1
54	Hübscher et al. (2008)							1
55	Yao et al. (2012)							1
56	Plaster et al. (2014)							1
57	Haser et al. (2017)							1
58	Devereux et al.							1
59	Huang et al. (2015)							1	1
60	Huang et al. (2007)							1
61	Zhou et al. (2012)							1
62	Rossi et al. (2017)							1
63	Garcia et al. (2006)								1
64	Garcia et al. (2011)								1
65	Venancio et al. (2008)								1		1				1
66	Bahadir et al. (2009)								1
67	Gonzalez et al. (2012)								1
68	Zarei et al. (2019)									1																								1
69	Castro-Sanchez et al. (2020)									1
70	Tabatabaiee et al. (2019)									1									1
71	0nat et al. (2019)									1									1
72	Martin-rodriguez et al. (2019)									1									1
73	Manafnezhad et al. (2019)									1									1								1
74	Luan et al. (2019)									1									1
75	Kamali et al. (2019a)									1											1
76	Gildir et al. (2019)									1											1
77	Ceballos-Laita et al. (2019)									1
78	Bagcier et al. (2020)									1																1
79	Aydin et al. (2019)									1
80	Sánchez-Romero et al. (2018)									1																									1
81	Rahbar et al. (2018)									1																											1
82	Gaubeca-Gilarranz et al. (2018)									1
83	Velázquez-Saornil et al. (2017)									1																				1				1
84	Tuzun et al. (2017)									1
85	Tasoglu et al. (2017)									1
86	Sobhani et al. (2017)									1								1	1								1
87	Espí-López et al. (2017)									1																								1
88	Mahmoudzadeh et al. (2016)									1																						1	1
89	Segura-Orti et al. (2016)									1								1	1
90	Arias-Buria et al. (2016)									1														1				1
91	Perez-Palomares et al. (2017)							1		1																		1
92	Salom-Moreno et al. (2017)									1																		1
93	Ziaeifar et al. (2019)									1									1
94	Eftekharsadat et al. (2016)									1																				1						1	1
95	Gungor et al. (2021)										1
96	Rastegar et al. (2017)										1																										1
97	Brennan et al. (2017)										1
98	Uygur et al. (2017)									1																1
99	Uygur et al. (2019)										1																										1
100	Uygur et al. (2021)										1
101	Itoh et al. (2004)											1																			1	1	1
102	Itoh et al. (2006)											1																				1	1
Upper Quarter
103	Tough 2010												1									1
104	Gallego-Sendarrubias, 2020												1														1
105	Stieven, 2020												1														1
106	Leon-Hernandez,2016												1
107	Valiente-Castrillo, 2021												1						1								1
108	Silva, 2012														1	1
109	Venancio, 2009														1
110	Uemoto, 2013														1	1
111	Gonzalez-Perez, 2015														1	1
112	Nixdorf, 2002														1														1
113	Von Lindern, 2003														1
114	Guarda-Nardini, 2008														1														1
115	Kurtoglu, 2008														1														1
116	Ernberg, 2011														1														1
117	Christidis, 2007														1														1
118	Christidis, 2015														1														1
119	Castrillon, 2008														1
120	Guarda-Nardini, 2012														1
121	De Carli , 2016														1
122	Itoh, 2012															1
123	Ga, 2007b																1
124	Ma, 2010																1					1
125	De Meulemeester, 2017																	1	1
126	Rayegani, 2014																		1			1								1
127	Aridici, 2016																		1
128	Hayta, 2016																		1
129	Ziaeifar, 2016																		1
130	Fernández-Carnero, 2017																		1
131	Dogan, 2019																		1
132	Sukareechai, 2019																		1
133	Arias-Buría, 2020																		1
134	García-de-Miguel, 2020																		1
135	Ga, 2007c																			1		1	1
136	Ibrahim, 2019																			1
137	Raeissadat, 2018																			1
138	Lee, 2001																				1
139	Patra, 2017																				1
140	Patra, 2018																				1
141	Sedighi, 2017																				1
142	Togha, 2020																				1
143	de Abreu, 2008																				1
144	de Abreu, 2009																				1
145	Chou, 2009																					1
146	Chou, 2011																					1
147	Krishnan, 2000																					1
148	Arias-Buría et al.(2018)																							1
149	Imani et al.(2020)																							1
150	Kheradmandi et al.(2020)																							1	1
151	Kamali et al.(2019b)																							1				1
152	Halle et al.(2020)																							1
153	Ekici et al.(2021)																							1
154	Jalilipanah et al.(2020)																							1
155	Koppenhaver et al.(2016)																							1
156	Mendigutia-Gómez et al.(2016)																								1
157	Liu et al.(2016)																								1
158	García-Gallego et al.(2011)																									1
159	Sukumar et al.(2014)																									1
160	Sukumar et al.(2015)																									1
161	Kheradmandi et al.(2015)																									1
162	Etminan et al.(2019)																									1
163	Gattie et al.(2021)																										1
164	Leon-Hernandez et al.(2021)																										1
165	Stieven et al.(2021)																										1
166	Goddard et al. (2002)																												1
167	Shen et al. (2007)																												1
168	Shen et al. (2009)																												1
169	Zotelli et al. (2017)																												1
170	Nitecka-Buchta et al. (2018)																												1
171	Nitecka-Buchta et al. (2019)																												1
172	Lopez-Martos et al. (2018)																												1
173	Kütük et al. (2019)																												1
174	Da Silva Faria et al. (2013)																												1
175	Atef Fouda et al. (2014)																												1
176	Sabatke et al. (2015)																												1
177	Varsha A Jadhao et al. (2017)																												1
Lower Quarter
178	Sanchez et al. (2020)																													1
179	Al-Boloushi et al. (2019)																													1
180	Mason et al. (2016)																													1				1
181	Macdonald et al (1983)																														1
182	Jiang et al. (2013)																															1
183	Wu et al. (2014)																															1
184	Chen et al. (2014)																															1	1
185	Kuang et al. (2013)																															1	1
186	Nong et al. (2013)																															1
187	Fu et al. (2011)																															1
188	Tellez-Garcia (2015)																															1	1
189	Hirota et al. (2006)																															1	1
190	Itoh et al. (2005)																															1	1
191	Shen et al. (2015)																															1	1
192	Yang et al. (2010)																															1	1
193	Long et al. (2012)																															1	1
194	Abyaneh et al. (2016)																																	1
195	Sutlive et al. (2018)																																	1
196	Patel et al. (2019)																																	1
197	Itoh et al. (2008)																																	1	1
198	Sánchez-Romero et al. (2019)																																	1	1
199	da Graca-Tarrago et al. (2016)																																		1
200	da Graca-Tarrago et al. (2019)																																		1
201	Dunning et al. (2018)																																		1
202	Elbadawy et al. (2016)																																		1
203	Weiner et al. (2008)																																		1
204	Weiner et al. (2013)																																		1
205	Zhang et al. (2011)																																			1
206	Li et al. (2014)																																			1
207	Kumnerddee et al. (2012)																																			1
208	Wang et al. (2016)																																			1
209	Qian et al. (2015)																																			1
210	Bagcier et al. (2020)																																				1

## Sheet: CCA Table for pairs of reviews
Upper Quarter	Al-Moraissi (2019) (33)	Blanco-Diaz et al. (2022) (34)	Cagnie et al. (2015) (35)	Fernández-De-Las-Peñas. (2021) (36)	Hall et al. (2018) (21)	Kietrys et al. (2013) (37)	Lew et al. (2021) (38)	Liu et al. (2015) (39)	Machado et al. (2018) (40)	Navarro-Santana et al. (2020) (41)	Navarro-Santana et al. (2020) (22)	Navarro-Santana et al. (2021) (42)	Navarro-Santana et al. (2022) (43)	Ong et al. (2013) (44)	Pourahmadi et al. (2021) (45)	Rodríguez-Huguet et al. (2022) (46)
Blanco-Diaz et al. (2022) (34)	0
Cagnie et al. (2015) (35)	0	0
Fernández-De-Las-Peñas. (2021) (36)	0	0	0
Hall et al. (2018) (21)	0	0.0526	0	0
Kietrys et al. (2013) (37)	0	0	0.25	0	0.0952
Lew et al. (2021) (38)	0	0	0	0.04	0.0625	0
Liu et al. (2015) (39)	0	0	0.2174	0.037	0.1071	0.5238	0.04
Machado et al. (2018) (40)	0.3	0	0	0	0	0	0	0
Navarro-Santana et al. (2020) (41)	0	0	0.0588	0.0286	0.0263	0.1111	0.2143	0.1163	0
Navarro-Santana et al. (2020) (22)	0	0	0	0	0	0	0	0	0	0
Navarro-Santana et al. (2021) (42)	0	0.1538	0	0	0.1333	0	0.0909	0	0	0	0
Navarro-Santana et al. (2022) (43)	0	0	0.25	0	0	0.1176	0	0.1739	0	0	0	0
Ong et al. (2013) (44)	0	0	0	0	0	0.3077	0	0.25	0	0.0313	0.5	0, 00%	0
Pourahmadi et al. (2021) (45)	0	0	0.1875	0	0	0	0	0	0	0	0	0	0	0
Rodríguez-Huguet et al. (2022) (46)	0	0	0	0.1875	0	0.0455	0.1333	0.0333	0	0.0833	0	0	0	0	0
Vier et al. (2019) (47)	0.12	0	0	0	0	0	0	0	0.3158	0	0	0	0	0	0	0
LQ	He et al. (2017) (48)	Hu et al.(49)	Khan et al.(50)	Liu et al.(51)	Llurda-Almuzara et al.(52)	Morihisa et al.(53)	Rahou-El-Bachiri et al.(54)
Hu et al.(49)	0
Khan et al.(50)	0.1333	0
Liu et al.(51)	0	0.6875	0
Llurda-Almuzara et al.(52)	0.1818	0	0.1429	0
Morihisa et al.(53)	0.0833	0.0476	0.2308	0.0625	0.0909
Rahou-El-Bachiri et al.(54)	0	0	0.1765	0	0	0.0667
Ughreja et al.(55)	0	0	0	0	0	0	0.1176
Full body	Boyles et al. (2015) (23)	Charles et al.(2019) (24)	Cummings et al. (2001) (25)	Espejo-Antúnez et al. (2017) (26)	Gattie et al. (2017) (27)	Kim et al. (2012) (28)	Mansfield et al. (2019) (20)	Rodríguez-Mansilla et al. (2016) (29)	Sánchez-Infante et al. (2011) (30)	Sousa Filho et al. (2021) (31)
Charles et al. (2019) (24)	0.2353
Cummings et al. (2001) (25)	0	0.037
Espejo-Antúnez et al. (2017) (26)	0.36	0.4615	0
Gattie et al. (2017) (27)	0.1852	0.44	0	0.2174
Kim et al. (2012) (28)	0	0	0	0	0
Mansfield et al. (2019) (20)	0.0256	0.0476	0	0.0286	0.0625	0
Rodríguez-Mansilla et al. (2016) (29)	0.2667	0.3125	0	0.2143	0.0323	0	0.0256
Sánchez-Infante et al. (2011) (30)	0.1091	0.1818	0	0.1176	0.1957	0	0.0862	0.0339
Sousa Filho et al. (2021) (31)	0	0	0	0	0	0	0	0.0417	0
Tough et al. (2009) (32)	0.04	0.1538	0.0909	0.0476	0	0	0	0.1304	0	0
